# Supplementary material
Source: MDPI journal article supplement (https://www.mdpi.com/2076-3417/10/22/7950)
Supplement: s1 [file s1]

# Supplementary Materials: Immobilization of Heavy Metals in Contaminated Soils—Performance Assessment in Conditions Similar to a Real Scenario

Antonio Correia, Martim P. S. R. Matos, Ana R. Gomes and Maria G. Rasteiro

**Table S1.** Results of the individual adsorption tests – Adsorption of the heavy metals under study by the Soil, suspension of MWCNTs in water, and suspension of Soil with addition of MWCNTs (MWCNTs = 0.01%, w/w).

|      | Soil (reference) |                | MWCNTs   |                | Soil + MWCNTs |                |
|------|------------------|----------------|----------|----------------|---------------|----------------|
|      | Lead             |                |          |                |               |                |
| min  | C (mg/l)         | Adsorption (%) | C (mg/l) | Adsorption (%) | C (mg/l)      | Adsorption (%) |
| 0    | 105.3            | 0.0            | 105.3    | 0.0            | 105.3         | 0.0            |
| 5    | 5.8              | 94.5           | 20.5     | 80.5           | 2.9           | 97.3           |
| 20   | 5.7              | 94.5           | 27.4     | 74.0           | 2.7           | 97.5           |
| 60   | 4.6              | 95.6           | 26.4     | 74.9           | 3.0           | 97.1           |
| 240  | 4.5              | 95.7           | 24.9     | 76.4           | 3.0           | 97.2           |
| 1440 | 5.7              | 94.6           | 24.9     | 76.4           | 3.0           | 97.2           |
|      | Copper           |                |          |                |               |                |
| min  | C (mg/l)         | Adsorption (%) | C (mg/l) | Adsorption (%) | C (mg/l)      | Adsorption (%) |
| 0    | 41.0             | 0.0            | 41.0     | 0.0            | 40.95         | 0.0            |
| 5    | 10.3             | 74.9           | 35.2     | 14.0           | 0.3           | 99.2           |
| 20   | 7.9              | 80.6           | 34.6     | 15.4           | 0.3           | 99.3           |
| 60   | 8.5              | 79.2           | 40.3     | -              | 0.3           | 99.3           |
| 240  | 7.4              | 82.0           | 32.6     | 20.4           | 0.3           | 99.3           |
| 1440 | 7.2              | 82.5           | 33.4     | 18.4           | 0.3           | 99.3           |
|      | Nickel           |                |          |                |               |                |
| min  | C (mg/l)         | Adsorption (%) | C (mg/l) | Adsorption (%) | C (mg/l)      | Adsorption (%) |
| 0    | 158.4            | 0.0            | 158.4    | 0.0            | 158.4         | 0.0            |
| 5    | 89.3             | 43.6           | 33.7     | 78.7           | 29.9          | 81.1           |
| 20   | 88.5             | 44.2           | 29.6     | 81.3           | 31.2          | 80.3           |
| 60   | 89.5             | 43.5           | 28.0     | 82.3           | 28.0          | 82.3           |
| 240  | 79.2             | 50.0           | 38.5     | 75.7           | 28.0          | 82.3           |
| 1440 | 100.2            | 36.7           | 32.5     | 79.5           | 28.4          | 82.1           |
|      | Zinc             |                |          |                |               |                |
| min  | C (mg/l)         | Adsorption (%) | C (mg/l) | Adsorption (%) | C (mg/l)      | Adsorption (%) |
| 0    | 106              | 0.0            | 106      | 0.0            | 106           | 0.0            |
| 5    | 88.2             | 16.8           | 83.8     | 20.9           | 82.4          | 22.3           |
| 20   | 85               | 19.8           | 85.9     | 19.0           | 88.8          | 16.2           |
| 60   | 86.6             | 18.3           | 87.3     | 17.6           | 90.5          | 14.6           |
| 240  | 83.6             | 21.1           | 83.6     | 21.1           | 70.2          | -              |
| 1440 | 85.4             | 19.4           | 82.9     | 21.8           | 87.1          | 17.8           |

**Table S2.** Results of the individual adsorption tests – Adsorption of the heavy metals under study by a suspension of Montmorillonite in water and suspension of Soil with addition of Montmorillonite (montmorillonite = 0.01%, w/w) (results for soil alone as reference are given in Table S1).

| Montmorillonite |          |                | Soil + Montmorillonite |                |
|-----------------|----------|----------------|------------------------|----------------|
|                 | Lead     |                |                        |                |
| min             | C (mg/l) | Adsorption (%) | C (mg/l)               | Adsorption (%) |
| 0               | 105.3    | 0.0            | 105.3                  | 0.0            |
| 5               | 33.5     | 68.2           | 1.4                    | 98.6           |
| 20              | 36.0     | 65.8           | 1.4                    | 98.6           |
| 60              | 32.5     | 69.1           | 1.3                    | 98.7           |
| 240             | 32.5     | 69.1           | 1.7                    | 98.3           |
| 1440            | 34.2     | 67.5           | 0.1                    | 99.9           |
|                 | Copper   |                |                        |                |
| min             | C (mg/l) | Adsorption (%) | C (mg/l)               | Adsorption (%) |
| 0               | 40.9     | 0.0            | 40.9                   | 0.0            |
| 5               | 40.7     | 0.6            | 5.0                    | 87.6           |
| 20              | 39.7     | 3.1            | 4.7                    | 88.4           |
| 60              | 40.8     | 0.3            | 4.4                    | 89.2           |
| 240             | 35.6     | 13.1           | -                      | -              |
| 1440            | 37.7     | 7.9            | 4.3                    | 89.3           |
|                 | Nickel   |                |                        |                |
| min             | C (mg/l) | Adsorption (%) | C (mg/l)               | Adsorption (%) |
| 0               | 158.4    | 0.0            | 158.4                  | 0.0            |
| 5               | 140.9    | 11.0           | 58.7                   | 62.9           |
| 20              | 139.9    | 11.6           | 66.6                   | 57.9           |
| 60              | 138.5    | 12.5           | 76.5                   | 51.7           |
| 240             | 134.9    | 14.8           | 59.8                   | 62.2           |
| 1440            | -        | -              | 61.3                   | 61.3           |
|                 | Zinc     |                |                        |                |
| min             | C (mg/l) | Adsorption (%) | C (mg/l)               | Adsorption (%) |
| 0               | 106.0    | 0.0            | 106                    | 0.0            |
| 5               | 91.2     | 13.9           | 83.4                   | 21.3           |
| 20              | 89.2     | 15.8           | 82.9                   | 21.7           |
| 60              | 88.8     | 16.2           | 81.4                   | 23.2           |
| 240             | 90.4     | 14.7           | 85.9                   | 18.9           |
| 1440            | 89.3     | 15.7           | -                      | -              |

**Table S3.** Results of the percolation tests – adsorption of the heavy metals under study by soil with or without the addition of MWCNTs.

| Heavy Metal | Adsorption (%)   |                       |                       |
|-------------|------------------|-----------------------|-----------------------|
|             | Soil (reference) | Soil + MWCNTs (0.01%) | Soil + MWCNTs (0.05%) |
| Lead        | 99.73            | 99.85                 | -                     |
| Copper      | 99.81            | 99.88                 | -                     |
| Nickel      | 69.54            | 76.68                 | 99.86                 |
| Zinc        | 59.11            | 76.89                 | 97.06                 |

**Table S4.** Results of the percolation tests – adsorption of the heavy metals under study by soil with or without the addition of Montmorillonite.

| Heavy Metal | Adsorption (%)                                        |                                         |                                      |
|-------------|-------------------------------------------------------|-----------------------------------------|--------------------------------------|
|             | Soil + Montmorillonite-Natural (25Kg/m <sup>3</sup> ) | Soil + Montmorillonite-Modified (0.01%) | Soil + Montmorillonite-Modified (1%) |
| Lead        | 99.98                                                 | -                                       | -                                    |
| Copper      | 99.99                                                 | -                                       | -                                    |
| Nickel      | 86.86                                                 | 76.83                                   | 99.75                                |
| Zinc        | 93.04                                                 | 72.17                                   | 97.68                                |

**Table S5.** Results of the percolation tests – adsorption of the heavy metals under study by soil with the addition of Portland cement without or with addition of a second additive (MWCNTs or Montmorillonite).

| Heavy Metal | Adsorption (%) |                        |                                 |
|-------------|----------------|------------------------|---------------------------------|
|             | Soil + Binder  | Soil + Binder + MWCNTs | Soil + Binder + Montmorillonite |
| Lead        | 99.99          | 99.99                  | 99.99                           |
| Copper      | 99.99          | 99.99                  | 99.93                           |
| Nickel      | 99.88          | 99.91                  | 94.54                           |
| Zinc        | 99.91          | 99.99                  | 92.77                           |
